# Supplementary material for: Associations between Tobacco Use, Surges, and Vaccination Status over Time in the COVID-19 Era
Source: MDPI journal article supplement (doi:10.3390/ijerph20021153), 2023-01-09
Supplement: s1 [file s1]

**Table S1.** Multinomial model predicting daily and non-daily tobacco use for visits occurring when the vaccine was available.

| Predictor          | Daily tobacco use vs. nonuse |       |      |            | Non-daily tobacco use vs. nonuse |       |      |            |
|--------------------|------------------------------|-------|------|------------|----------------------------------|-------|------|------------|
|                    | Coeff.                       | SE    | O.R. | 95% CI     | Coeff.                           | SE    | O.R. | 95% CI     |
| Intercept          | -2.83                        | 0.15  | -    | -          | -3.51                            | 0.23  | -    | -          |
| Time               | 0.02                         | <0.01 | 1.02 | 1.01, 1.02 | 0.02                             | <0.01 | 1.02 | 1.01, 1.02 |
| Vaccination status | -0.31                        | 0.02  | 0.73 | 0.70, 0.76 | -0.15                            | 0.03  | 0.87 | 0.81, 0.92 |
| Surge              | -0.13                        | 0.02  | 0.88 | 0.85, 0.91 | -0.08                            | 0.03  | 0.93 | 0.88, 0.98 |
| Race               |                              |       |      |            |                                  |       |      |            |
| Black/AA           | 0.18                         | 0.02  | 1.20 | 1.15, 1.25 | 0.50                             | 0.03  | 1.65 | 1.55, 1.76 |
| Asian American     | -0.51                        | 0.04  | 0.60 | 0.56, 0.64 | -0.21                            | 0.05  | 0.81 | 0.73, 0.90 |
| NH/PI              | -0.11                        | 0.06  | 0.90 | 0.80, 1.00 | 0.09                             | 0.09  | 1.09 | 0.93, 1.29 |
| AI/AN              | 0.01                         | 0.07  | 0.99 | 0.86, 1.14 | 0.01                             | 0.11  | 1.01 | 0.82, 1.25 |
| Other              | -0.20                        | 0.03  | 0.82 | 0.77, 0.87 | <0.01                            | 0.04  | 1.00 | 0.92, 1.09 |
| Ethnicity          |                              |       |      |            |                                  |       |      |            |
| Hispanic           | -0.59                        | 0.03  | 0.56 | 0.53, 0.58 | 0.08                             | 0.03  | 1.09 | 1.02, 1.16 |
| Sex                | -0.54                        | 0.03  | 0.58 | 0.55, 0.62 | -0.93                            | 0.05  | 0.39 | 0.35, 0.44 |
| Age                | -0.01                        | <0.01 | 0.99 | 0.99, 0.99 | -0.03                            | <0.01 | 0.97 | 0.97, 0.98 |
| Visit Number       | 0.01                         | 0.02  | 1.01 | 0.97, 1.04 | -0.11                            | 0.03  | 0.90 | 0.85, 0.95 |
| VA location        | <0.01                        | <0.01 | 1.00 | 1.00, 1.00 | <0.01                            | <0.01 | 1.00 | 1.00, 1.00 |

Note: The following categories served as reference groups: No history of vaccination, visit not occurring during a COVID-19 surge, being Caucasian, being non-Hispanic, and being male.
